1 ***Benchmarking DNA isolation kits used in analyses of the urinary microbiome***

2

3 Lisa Karstens, Ph.D.<sup>1,2</sup>, Nazema Y. Siddiqui, M.D., M.H.S.<sup>3</sup>, Tamara Zaza, B.S.<sup>4</sup>, Alecsander  
4 Barstad<sup>2</sup>, Cindy L. Amundsen, M.D.<sup>3</sup>, Tatyana A. Sysoeva, Ph.D.<sup>4,\*</sup>

5

6 1 - Department of Obstetrics & Gynecology, Division of Urogynecology, Oregon Health &  
7 Science University, Portland, OR, 97239

8 2 - Department of Medical Informatics and Clinical Epidemiology, Division of Bioinformatics and  
9 Computational Biomedicine, Oregon Health & Science University, Portland, OR, 97239

10 3 - Department of Obstetrics & Gynecology, Division of Urogynecology and Reconstructive  
11 Pelvic Surgery, Duke University Medical Center, Durham, NC 27710

12 4 - Department of Biological Sciences, University of Alabama in Huntsville, Huntsville, AL 35899

13

14 \* - correspondence should be directed to Tatyana Sysoeva, +1(256) 824-6371,  
15 [tatyana.sysoeva@uah.edu](mailto:tatyana.sysoeva@uah.edu)

16

17

18

19

20 **Abstract**

21

22 The urinary microbiome has been increasingly characterized using next-generation sequencing.  
23 However, many of the technical methods have not yet been specifically optimized for urine. We  
24 sought to compare the performance of several DNA isolation kits used in urinary microbiome  
25 studies. A total of 11 voided urine samples and one buffer control were divided into 5 equal  
26 aliquots and processed in parallel using five commercial DNA isolation kits. DNA was quantified  
27 and the V4 segment of the 16S rRNA gene was sequenced. Data were processed to identify the  
28 microbial composition and to assess alpha and beta diversity of the samples. Tested DNA  
29 isolation kits result in significantly different DNA yields from urine samples but non-significant  
30 differences in the number of reads recovered, alpha, or beta diversity. DNA extracted with the  
31 Qiagen Biostic Bacteremia and DNeasy Blood & Tissue kits showed the fewest technical issues  
32 in downstream analyses, with the DNeasy Blood & Tissue kit also demonstrating the highest DNA  
33 yield. The Promega kit recovered fewer Gram positive bacteria compared to other kits. The  
34 Promega and DNeasy PowerSoil kits also appear to have some important biases towards over-  
35 representing certain Gram negative bacteria of biologic relevance within the urinary microbiome.

36

37 **Keywords:** urinary microbiome, kit comparison, microbial composition of urine, commensal  
38 urobiome, DNA isolation

39

40

## 41 **Introduction**

42 Resident microbes in multiple niches of the human body are being studied for their impact on  
43 health and disease. The microbiome of the urinary tract has not been extensively characterized  
44 though differences in urinary microbiota are evident in urologic conditions such as urgency urinary  
45 incontinence<sup>1-3</sup>. It is also likely that the presence of urinary commensals affects the propensity  
46 towards development of urinary tract infections<sup>4</sup>. It is now known that urine contains a range of  
47 fastidious bacteria that are not detected using standard urine culture, or even with the recently  
48 developed enhanced quantitative urine culture (EQUC) techniques<sup>1,5</sup>. As such, characterization  
49 of the urinary microbiome has been accomplished using culture-independent methods, relying on  
50 next generation sequencing methods such as bacterial 16S rRNA gene sequencing, also known  
51 as amplicon sequencing or marker gene sequencing.

52 Despite the fact that the urinary microbiome has been recognized for almost a decade,<sup>1</sup> many  
53 of the technical methods used in marker gene sequencing have not been optimized or  
54 standardized for detection of urinary microbiota, as has been done for other microbiome niches  
55<sup>6,7</sup>. When performing DNA sequencing on biological samples to extract information about the  
56 bacterial communities present, multiple technical steps are required in order to name and classify  
57 the microbes contained in the sample: sample collection, storage and handling, DNA isolation,  
58 amplification, and sequencing<sup>8</sup>. At each of these steps, bias could influence the final results, and  
59 several have been evaluated in recent studies. The method of sample collection affects the  
60 recovered urinary microbiome characteristics, with catheterized sampling offering the most  
61 specificity for the bladder environment<sup>1,9,10</sup>. As for storage and handling steps, high concentrations  
62 of certain chemicals in urine result in precipitation of crystalline and amorphous materials such as  
63 uric acid, calcium phosphates, calcium oxalate and others<sup>11</sup>. The presence of crystalline  
64 precipitants in urine were recently shown to alter the pelleting and lysis of cells, and biochemical  
65 reactions such as amplification via polymerase chain reaction (PCR) prior to sequencing<sup>12,13</sup>.  
66 Storage and handling of urine specimens after collection has also been investigated<sup>14</sup>, and  
67 demonstrate that urine samples should be cooled as soon as possible if a stabilizing agent such  
68 as Assay Assure<sup>®</sup> is not used.

69 In addition to sample collection, handling and storage, the DNA isolation methods used are  
70 another important step for microbiome analysis where bias could be introduced prior to  
71 sequencing. At this step, human and microbial DNA are extracted from the proteins, salts, and  
72 other components of the physiologic sample. This requires lysis of human cells and bacterial cell  
73 walls in order to isolate the DNA contained within. When performing marker gene sequencing,  
74 the isolated DNA is later subjected to PCR, where the marker gene is amplified and uniquely  
75 tagged for sequencing. The bacterial 16S rRNA gene is one of the most commonly used marker  
76 genes used for bacterial identification. To date, a range of amplicons encompassing multiple  
77 different variable regions of the 16S rRNA gene including V2, V3-V4, V4, V4-V5, and V6<sup>8,15,16</sup>  
78 have been applied to urinary microbiome samples.

79 Regardless of which segment of DNA is used as the marker gene, reliably isolating all of the  
80 DNA in a sample is an important step prior to PCR and sequencing. Many commercial kits and  
81 custom protocols for DNA isolation were developed for microbiome analyses specifically for  
82 microbe-rich or microbe-poor environments. This tailoring of DNA isolation methods was required  
83 to achieve more representative identification and quantification of the microbial composition for  
84 each respective environment. Nevertheless, different methods for DNA isolation show variable  
85 efficiencies of DNA recovery and quality. A large number of studies report significant differences  
86 in microbial composition identified with the use of different DNA isolation protocols<sup>17-24</sup>. Biases  
87 introduced by the DNA isolation methods to microbial composition persist both in microbe-rich  
88 communities such as gut, soil, sewage<sup>19,25</sup> and in microbe-poor communities such as water,

89 meconium, and animal larvae<sup>22,26</sup>. However, there are occasionally studies that do not show  
90 notable differences among DNA extraction methods in other microbial niches<sup>23</sup>.

91 Most studies that examine differences among DNA extraction protocols note that the main  
92 hurdles are incomplete cellular lysis and presence of PCR inhibitors that could interfere with  
93 downstream sequencing. Incomplete cellular lysis for some of the microbes biases the  
94 compositional analyses towards more easily lysed taxa. These differences in lysis were  
95 repeatedly recorded for Gram positive bacteria and fungi that both have more robust cell walls in  
96 comparison with the Gram negative bacteria<sup>20,26</sup>. For the urinary microbiome, researchers already  
97 found a significant bias in the ability to detect fungi due to the inability to efficiently lyse hardy  
98 fungal cells<sup>13,27</sup>. However, many urinary microbiome studies employ a variety of DNA isolation  
99 techniques without considering these potential sources of bias. Table S1 summarizes these  
100 studies to highlight the diversity of the methods of DNA isolation used to date. These studies use  
101 both custom and commercially available DNA isolation methods. As there are no studies directly  
102 comparing the results obtained when urine samples are subjected to different commercial DNA  
103 isolation kits, our primary objective was to assess whether recovered microbes identified by 16S  
104 rRNA sequencing differ based on the DNA isolation protocol.

105

## 106 **Results**

### 107 **DNA Recovery & Performance in High Throughput Sequencing**

108 A total of 11 urine samples and one negative control containing phosphate buffered saline  
109 (PBS) were equally divided and subjected to parallel DNA isolation procedures with five DNA  
110 isolation kits (Table 1). The total DNA concentration recovered from each DNA isolation kit was  
111 highly variable (Figure 1A, Table S3) with the Qiagen DNeasy Blood and Tissue kit resulting in  
112 the highest concentrations compared to the others (Kruskal-Wallis  $p = 0.0007$ ). Since each  
113 aliquot from urine samples contained the same starting material per kit, and each kit elutes DNA  
114 into the same volume, higher concentrations would reflect a higher total  
115 amount of DNA isolated. Of the 60 samples (55 from urine and 5 controls), a total of 7  
116 (11.6%) did not produce identifiable bands on gel electrophoresis after PCR  
117 amplification of the V4 region of the 16S rRNA gene (Table S3, Figure S1A). The  
118 majority of these samples were derived from one urine specimen with the lowest quantity  
119 of recovered DNA (Sample 11) and negative controls, suggesting truly low  
120 quantity DNA in these samples. However, in one instance (Sample 4), no gel band was  
121 detected after PCR when DNA was extracted with the Qiagen DNeasy  
122 Ultraclean kit though bands were identified when DNA was isolated with all of the other  
123 four kits.  
124  
125  
126  
127  
128  
129  
130  
131  
132

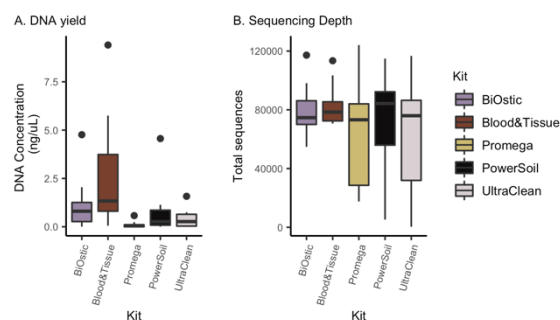

**Figure 1. Isolation kits produce different total DNA concentrations but similar 16S specific sequencing depth.** A. DNA concentration measured by Qubit varied significantly by DNA isolation kit used (Kruskal-Wallis  $p = 0.0007$ ). B. Differences in total DNA concentration did not translate to significant differences in the number of sequence reads per sample (Kruskal-Wallis  $p = 0.806$ ).

133 Despite the differences in DNA concentrations between isolation kits, DNA isolated from all  
134 kits appeared to perform similarly in high throughput sequencing. We did not identify significant  
135 differences in the total number of recovered reads based on the DNA isolation kit (Kruskal-Wallis

136  $p = 0.806$ , Figure 1B). Notably, sequencing reads were obtained even in samples without gel  
137 bands after PCR that might have originally been presumed to be devoid of DNA.

138

## 139 Microbial Composition

140 Alpha diversity measures summarize the composition of bacteria in a sample in terms of the  
141 numbers of different taxa present (richness) and their distribution (evenness). We did not identify  
142 significant differences in alpha diversity measured as the number of observed genera, the  
143 Shannon index, or the inverse Simpson index based on DNA isolation kit (Kruskal-Wallis  $p =$   
144  $0.292, 0.363, \text{ and } 0.436$ , respectively; Figure 2).

145 To evaluate the differences in the overall composition of taxa between DNA  
146 isolation kits, we estimated beta diversity using the Bray-Curtis distance  
147 and nonmetric multi-dimensional scaling (NMDS, Figure 3A),  
148 and evaluated the relative abundance of recovered bacteria in  
149 each sample (Figure 3B). For most of the samples the composition appears  
150 to be consistent despite the DNA isolation kit that was used. As such, the overall microbial composition was not  
151 significantly different based on the DNA isolation protocol (PERMANOVA  $p = 0.87$ ), with the  
152 exception of Sample 7, which displays high variability in both the relative abundance and NMDS  
153 plots. As expected, recovered microbes differed significantly across the 11 urine samples  
154 (PERMANOVA  $p = 0.001$ ).

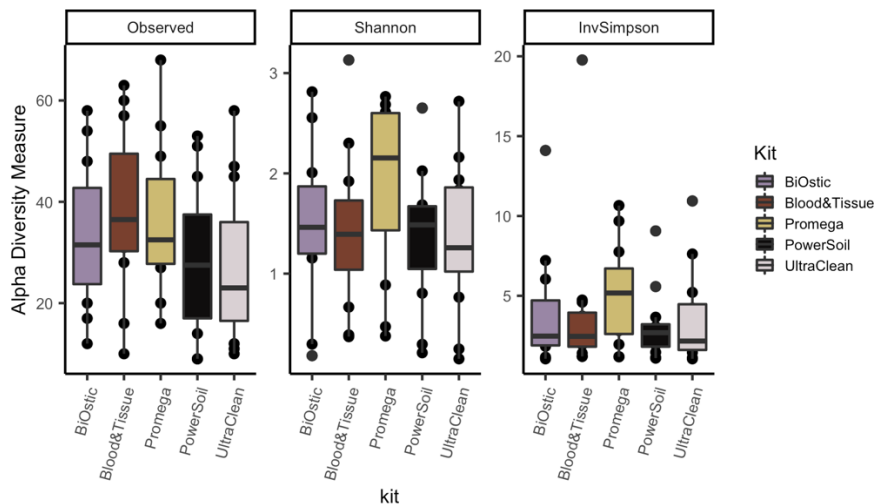

159 **Figure 2. Richness and evenness of the microbial composition does not**  
160 **depend on the testing DNA isolation kit** (Kruskal-Wallis  $p = 0.292, 0.363,$   
161 **and  $0.436$ , respectively).**

162 despite the DNA isolation kit that was used. As such, the overall microbial composition was not  
163 significantly different based on the DNA isolation protocol (PERMANOVA  $p = 0.87$ ), with the  
164 exception of Sample 7, which displays high variability in both the relative abundance and NMDS  
165 plots. As expected, recovered microbes differed significantly across the 11 urine samples  
166 (PERMANOVA  $p = 0.001$ ).

167

## 168 Recovery of Gram positive versus Gram negative bacteria

169 Prior studies comparing methods of DNA isolation from non-urine microbiome samples  
170 strongly indicated that the envelope structure of Gram positive organisms represents an  
171 impediment for uniform cell lysis. Therefore, we analyzed whether DNA isolation kits biased the  
172 identified microbial composition towards Gram negative species. We compared relative  
173 abundances among all genera with known Gram staining of representatives (Figure 4 and Figure  
174 S2 for individual sample results). Four out of five DNA isolation kits yielded comparable overall  
175 relative abundances of Gram positive bacteria. The Promega kit resulted in fewer Gram positive  
176 bacteria, though this was not statistically significant (Kruskal-Wallis,  $p = 0.197$ ), likely due to the  
177 small sample size and highly variable data.

178

179

181 Microbiome studies of different niches reveal that overall composition is important for health  
 182 and disease. However, infectious disease studies also show that specific microbes may be  
 183 important for an underlying condition. Therefore, we further analyzed the presence of eight  
 184 specific genera relevant for the urinary niche (Figure 5). These include genera containing three  
 185 known urinary pathogens (*Escherichia*, *Klebsiella*, *Enterococcus*) and five genera typically  
 186 considered as commensals (*Lactobacillus*, *Corynebacterium*, *Prevotella*, *Staphylococcus*,  
 187 *Gardnerella*). Results from this analysis confirm our observation that the Promega kit is  
 188 less efficient in extracting Gram positive bacteria, such as those belonging to the  
 189 *Enterococcus*, *Corynebacterium*, and *Staphylococcus* genera. On the other hand, the Qiagen  
 190 DNeasy PowerSoil kit appears to recover more of the ‘easy-to-lyse’ Gram negative  
 191 organisms such as *Klebsiella* and *Escherichia* compared to the other kits.

208

## 209 Discussion

210 The field of urinary microbiome research is still relatively new. As such, studies  
 211 benchmarking DNA isolation kits and their performance in recovering urinary  
 212 microbial composition data are lacking. This study aimed to compare several methods of  
 213 isolating microbial DNA from human urine. In particular, we compared five commercially  
 214 available DNA isolation kits and estimated not only the quantity of DNA, but also the  
 215 quality of DNA when utilized in downstream compositional analyses.

223 It has previously been shown that biases are introduced to microbial composition analysis  
 224 based on the DNA isolation technique in both high biomass and low biomass communities  
 225 of microbes<sup>19,22,26</sup>. Our results echo those found in oral microbial communities, where  
 226 the DNA isolation method may result in significantly different DNA yield, though overall  
 227 non-significant differences in downstream sequencing<sup>23</sup>. Though many of our downstream  
 228 assessments showed non-significant differences, our data do not support the assumption  
 229 that all DNA isolation kits perform equally in urinary microbiome studies, as we identified  
 some important qualitative

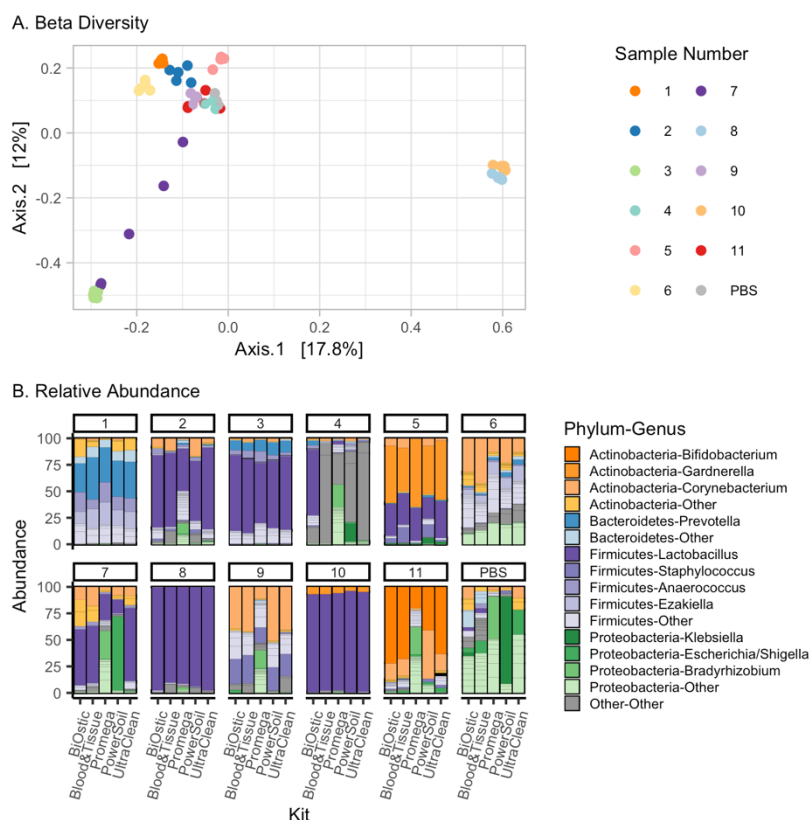

**Figure 3. Differences in the DNA isolation methods do not result in drastic changes in relative abundances of identified genera. A.** Multidimensional scaling plot using Bray-Curtis distance demonstrates that most samples are not significantly different due to DNA isolation kit ( $p = 0.87$  in PERMANOVA analysis), though samples 4 and 7 are not tightly clustered, indicating that these samples may have significant variations in microbiome composition by kit. **B.** Stacked bar plots represent the microbial composition of each sample after DNA isolation and 16S rRNA gene sequencing. Only sample 4, 7, and negative control PBS exhibit more variability.

230 differences in recovery of Gram positive versus Gram negative organisms. Since microbiome data  
231 are presented in terms of relative abundance, if one type of microbe is absent due to a technical  
232 bias, it will artificially make other microbes appear more abundant. This is evident when viewing  
233 graphs in Figure S2, where relative abundances of Gram positive and Gram negative bacteria are  
234 inversely proportional to each other.

235 In our study, after initial PCR  
236 amplification, four samples and three  
237 controls derived from extremely low  
238 quantities of DNA failed to show a band  
239 on electrophoresis. The lack of amplified  
240 DNA after beginning with extremely low  
241 quantities of DNA could be expected.  
242 However, in one instance a sample  
243 extracted with the UltraClean kit had  
244 normal quantities of starting DNA with no  
245 evident PCR product on electrophoresis.  
246 This one result could have been spurious  
247 or possibly indicative of the presence of  
248 PCR inhibitors in the sample, as have  
249 been identified in other studies.

250 Our findings are strengthened by the  
251 multiple ways in which we assessed  
252 quality of DNA after isolation. This  
253 included evaluation of PCR products,  
254 assessment of the number of sequencing  
255 reads after high-throughput sequencing,  
256 as well as detailed compositional analyses of microbial data. We utilized an updated and rigorous  
257 bioinformatics pipeline to identify the genera corresponding to recovered sequences. We then  
258 utilized this information to assess the quality of sequencing information, which revealed important  
259 differences based on Gram staining characteristics and in urogenital genera that are highly  
260 relevant to the urinary microbiome field.

261 Our study certainly has multiple limitations, which are mainly related to technical factors. After  
262 assessing recovered DNA quantity using Qubit, we did not perform additional testing to assess  
263 the proportion of microbial versus human DNA contained in each sample. Thus, it is unclear if  
264 differences identified in total DNA recovery actually translate to differences in microbial DNA  
265 within different samples, which is the component of interest in microbiome studies. Another  
266 limitation was inherent in the need to divide urine samples. Though one urine sample was  
267 produced, we needed to ensure that it was equally divided prior to performing parallel testing with  
268 five kits. Since the biomass (e.g. cellular material containing DNA) may not be evenly distributed  
269 within the fluid of a urine sample, we addressed this issue by first centrifuging whole urine to  
270 produce a cell pellet containing the biomass. This cell pellet was then reconstituted in a smaller  
271 volume, thoroughly mixed, and then divided into five aliquots. However, it is still possible that due  
272 to pipetting or mixing errors, slightly different amounts of starting material were present in aliquots,  
273 which could have contributed to some of the variability seen in our results. However, we believe  
274 this factor is less important since urine volume did not correlate with biomass. For example, as  
275 shown in Tables S2 & S3, a 50mL sample (Sample 3) had the highest amount of recovered DNA  
276 while another 100mL sample had the lowest amount of recovered DNA. We utilized a negative  
277 control (PBS buffer) that was processed and sequenced in parallel to the urine samples. Though  
278 there was no starting added DNA in this sample, we recovered a small number of sequences  
279 (Figure S1) suggesting presence of low level contaminants. Unfortunately, we did not use

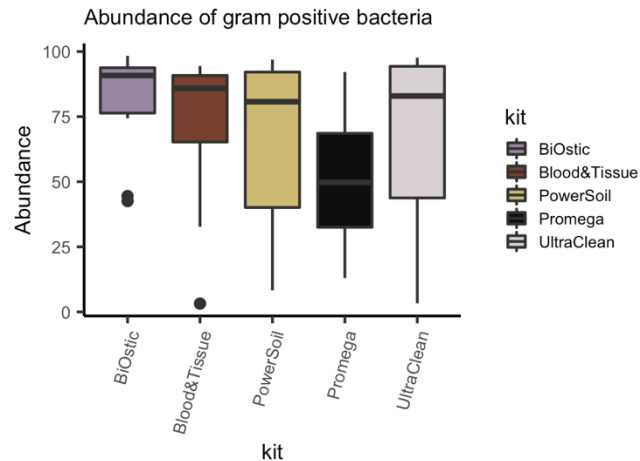

**Figure 4. DNA from Gram positive bacteria was consistently presented in four out of five tested DNA isolation kits.** The Promega kit recovered Gram positive bacteria, but at lower abundance than the other kits, though this was not significantly different (Kruskal-Wallis,  $p = 0.197$ ).

280 separate controls at each analytic step and thus we are unable to distinguish the sources of the  
 281 observed contamination, which could come from plastics in the laboratory, reagents within the  
 282 DNA isolation kits, or during multiple technical steps prior to sequencing.

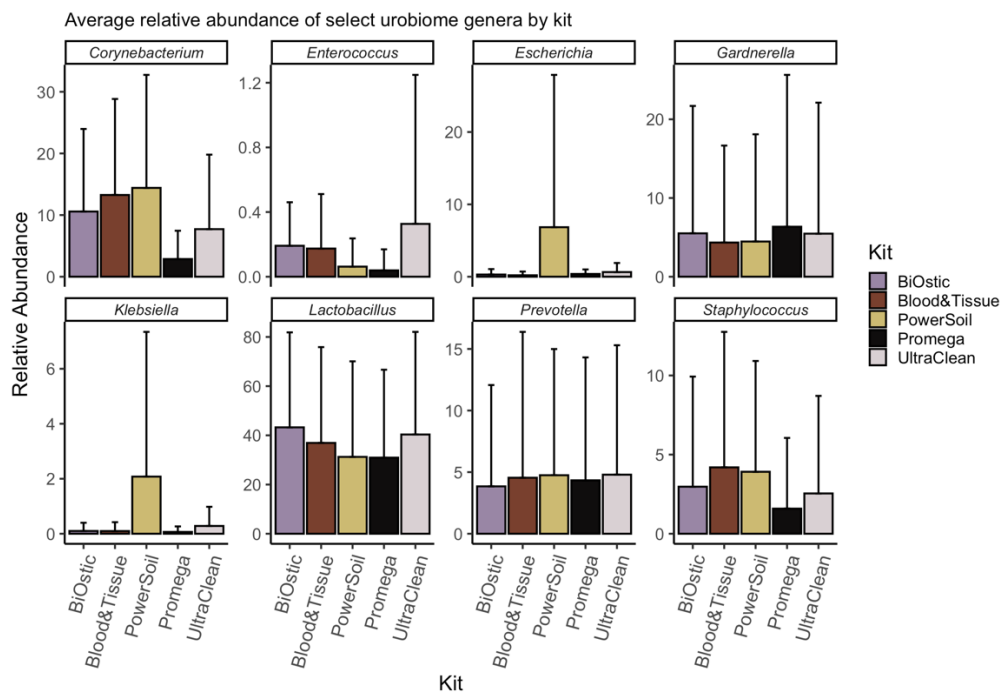

**Figure 5. Comparison of relative abundances of genera with biologically-significant representatives.** We compared relative abundances of bacteria recovered from eight genera with high biologic relevance including urinary pathogens (*Escherichia*, *Klebsiella*, *Enterococcus*) and commensals (*Lactobacillus*, *Corynebacterium*, *Prevotella*, *Staphylococcus*, *Gardnerella*). *Corynebacterium*, *Enterococcus*, *Lactobacillus*, and *Staphylococcus* are Gram positive bacteria and thus have cell walls that are more difficult to lyse during DNA isolation. *Gardnerella* are considered Gram variable while the *Escherichia*, *Klebsiella*, and *Prevotella* are considered Gram negative bacteria. The Promega kit tends to recover fewer Gram positive *Corynebacteria*, *Enterococci*, and *Staphylococci* compared to other kits while the PowerSoil kit recovers more *Escherichia* and *Klebsiella* compared to other kits.

283  
 284 This study utilized voided urine, which is more reflective of the urogenital microbiome than the  
 285 bladder microbiome. Since we are not attempting to characterize a niche, the method of urine  
 286 sample acquisition is less important. However, microbes from the vagina are found in higher  
 287 abundance in voided compared to catheterized urinary samples, and thus may have higher  
 288 representation in the compositional data presented here. Since vaginal and urinary microbes are  
 289 highly related in terms of the genera and species represented, vaginal contamination theoretically  
 290 should not negatively impact the results of this benchmarking study<sup>28,29</sup>. Nevertheless, studies  
 291 such as this one would ideally be replicated numerous times to confirm the findings.

292  
 293 **Conclusions**

294 When considering the totality of our findings, DNA extracted with the Qiagen Biotic  
 295 Bacteremia and DNeasy Blood & Tissue kits showed the fewest technical issues in downstream  
 296 analyses, with the DNeasy Blood & Tissue kit also demonstrating the highest DNA yield. All five  
 297 kits provided good quality DNA for high throughput sequencing with non-significant differences in  
 298 the number of reads recovered, alpha, or beta diversity. However, in qualitatively assessing the  
 299 types of bacteria, the Promega kit recovered fewer Gram positive bacteria compared to other kits.



300 The Promega and DNease PowerSoil kit also appear to have some important biases towards  
301 over-representing certain Gram negative bacteria of biologic relevance within the urinary  
302 microbiome. These findings have implications for research teams wishing to maximize utility of  
303 low biomass samples, particularly for sequencing strategies where more DNA is required.  
304 Furthermore, these findings are relevant for interpretation of microbiome studies. The results  
305 presented here are certainly in line with other microbiome niches suggesting that the DNA  
306 isolation methods used could potentially bias downstream results. As such, we urge caution to  
307 investigators when selecting which DNA isolation method is used in future urinary microbiome  
308 studies, caution to the scientific community when assessing findings from studies where isolation  
309 methods with known bias were used, and further urge a high level of caution in general when  
310 trying to compare or extrapolate results from studies where different DNA isolation methodologies  
311 were used.

312

## 313 **Materials and Methods**

### 314 **Sample collection and processing**

315 This study was deemed exempt by the Duke University Institutional Review Board  
316 (Pro00085111). Following all relevant guidelines, de-identified voided urine samples were  
317 collected in sterile cups from the Duke Urogynecology clinic, refrigerated (4°C), and processed  
318 within 4-10 hours (Table S2). As the study was deemed exempt by IRB no consent was obtained.  
319 During processing, samples were handled aseptically, transferred to 50 mL conical tubes and  
320 spun to collect all of the biomass, including human and microbial cells (4°C, Eppendorf 5810R  
321 centrifuge, 15 min, 3,220 rcf) represented in the “cell pellet”. Supernatants were decanted and  
322 the remaining cell pellets with residual urine were transferred into sterile 1.5 mL tubes, then spun  
323 again at 10,000 rcf in the Eppendorf 5340R centrifuge for 5 min at 4°C. The total cell pellet per  
324 sample was resuspended in sterile filtered phosphate buffered saline (PBS) on ice. Re-suspended  
325 pellets were divided into 5 identical aliquots, and stored at -80°C until DNA isolation.  
326

### 327 **DNA isolation procedures**

328 This step started with the five identical aliquots and thus the same starting material was  
329 processed in parallel with five commercially available DNA isolation kits. Each kit had differing  
330 levels of chemical, mechanical, and enzymatic cell lysis, as summarized in Table 1. PBS buffer  
331 was used as a negative control sample with each DNA isolation kit. For the Qiagen DNeasy Blood  
332 & Tissue kit we performed the optional steps as recommended in the protocol for optimizing  
333 recovery of gram-positive bacteria. All samples were assessed using the Agilent 2100  
334 Bioanalyzer, Promega GlowMax spectrophotometer and ThermoFisher Qubit HR reagents to  
335 determine the quality and quantity of recovered DNA. Recovered DNA concentrations are  
336 provided in Table S3.

337

### 338 **Bacterial ribosomal DNA amplification and sequencing**

339 DNA samples and negative control were subjected to PCR in order to amplify the V4 variable  
340 region of the 16S rRNA gene. For PCR, forward primer 515 and reverse primer 806 were used  
341 following the Earth Microbiome Project protocol (<http://www.earthmicrobiome.org/>). These  
342 primers (515F and 806R) carry unique barcodes allowing for construction of a library of pooled  
343 samples for sequencing. PCR products were quantified and pooled. In instances where no PCR  
344 product was detected (see Table S3), equivalent volumes of the final PCR amplification solution  
345 were pooled with the others. Combined pooled samples were then submitted for sequencing on  
346 an Illumina MiSeq sequencer configured for 150 base-pair paired-end sequencing runs. DNA

347 samples for all kits were prepared and sequenced together to avoid processing and sequencing  
348 batch variations.

349

### 350 **Sequencing data processing and analysis**

351 Raw sequences were trimmed and de-multiplexed prior to being processed with DADA2  
352 (v.1.14.0) to provide amplicon sequence variants (ASVs) per sample<sup>30</sup>. ASVs were compared  
353 against the SILVA reference database (v.132) using the RDP classifier implemented in DADA2  
354 for identification of taxa prior to being analyzed with phyloseq and vegan in R<sup>31–33</sup>. Overall  
355 microbial composition was assessed by estimating alpha diversity (number of observed genera,  
356 Shannon Index, and Inverse Simpson Index) as well as beta diversity using the Bray-Curtis  
357 distance. Comparisons across the 5 isolation kits were statistically evaluated using the Kruskal-  
358 Wallis rank sum tests followed by pair-wise comparisons using Wilcoxon-rank sum tests, and  
359 PERMANOVA for Bray-Curtis distances.

360

### 361 **Data Availability**

362 All sequences are available for download in the Sequence Read Archive under Accession  
363 Number PRJNA PRJNA662669 (<http://www.ncbi.nlm.nih.gov/bioproject/662669>).

364

### 365 **References:**

- 366 1. Wolfe, A. J. *et al.* Evidence of uncultivated bacteria in the adult female bladder. *J. Clin.*  
367 *Microbiol.* (2012). doi:10.1128/JCM.05852-11
- 368 2. Karstens, L. *et al.* Does the urinary microbiome play a role in urgency urinary  
369 incontinence and its severity? *Front. Cell. Infect. Microbiol.* (2016).  
370 doi:10.3389/fcimb.2016.00078
- 371 3. Pearce, M. M. *et al.* The female urinary microbiome in urgency urinary incontinence. *Am.*  
372 *J. Obstet. Gynecol.* (2015). doi:10.1016/j.ajog.2015.07.009
- 373 4. Brubaker, L. & Wolfe, A. J. The female urinary microbiota, urinary health and common  
374 urinary disorders. *Annals of Translational Medicine* (2017). doi:10.21037/atm.2016.11.62
- 375 5. Hilt, E. E. *et al.* Urine is not sterile: Use of enhanced urine culture techniques to detect  
376 resident bacterial flora in the adult female bladder. *J. Clin. Microbiol.* (2014).  
377 doi:10.1128/JCM.02876-13
- 378 6. Kim, D. *et al.* Optimizing methods and dodging pitfalls in microbiome research.  
379 *Microbiome* (2017). doi:10.1186/s40168-017-0267-5
- 380 7. Kerckhof, F. M. *et al.* Optimized cryopreservation of mixed microbial communities for  
381 conserved functionality and diversity. *PLoS One* (2014).  
382 doi:10.1371/journal.pone.0099517
- 383 8. Karstens, L. *et al.* Community profiling of the urinary microbiota: considerations for low-  
384 biomass samples. *Nature Reviews Urology* (2018). doi:10.1038/s41585-018-0104-z
- 385 9. Pohl, H. G. *et al.* The urine microbiome of healthy men and women differs by urine  
386 collection method. *Int. Neurourol. J.* (2020). doi:10.5213/inj.1938244.122
- 387 10. Pyles, C. V. PERCUTANEOUS BLADDER ASPIRATION AND OTHER METHODS OF  
388 URINE COLLECTION FOR BACTERIOLOGIC STUDY. *Pediatrics* (1965).
- 389 11. Fogazzi, G. B. Crystalluria: A neglected aspect of urinary sediment analysis. *Nephrology*  
390 *Dialysis Transplantation* **11**, 379–387 (1996).

- 391 12. Munch, M. M. *et al.* Optimizing bacterial DNA extraction in urine. *PLoS One* (2019).  
392 doi:10.1371/journal.pone.0222962
- 393 13. Ackerman, L. A. *et al.* Optimization of DNA extraction from human urinary samples for  
394 mycobiome community profiling. *PLoS One* (2019). doi:10.1371/journal.pone.0210306
- 395 14. Jung, C. E. *et al.* Benchmarking urine storage and collection conditions for evaluating the  
396 female urinary microbiome. *Sci. Rep.* (2019). doi:10.1038/s41598-019-49823-5
- 397 15. Moustafa, A. *et al.* Microbial metagenome of urinary tract infection. *Sci. Rep.* (2018).  
398 doi:10.1038/s41598-018-22660-8
- 399 16. Wojciuk, B. *et al.* Urobiome: In sickness and in health. *Microorganisms* (2019).  
400 doi:10.3390/microorganisms7110548
- 401 17. Claassen, S. *et al.* A comparison of the efficiency of five different commercial DNA  
402 extraction kits for extraction of DNA from faecal samples. *J. Microbiol. Methods* (2013).  
403 doi:10.1016/j.mimet.2013.05.008
- 404 18. Henderson, G. *et al.* Effect of DNA extraction methods and sampling techniques on the  
405 apparent structure of cow and sheep rumen microbial communities. *PLoS One* (2013).  
406 doi:10.1371/journal.pone.0074787
- 407 19. Knudsen, B. E. *et al.* Impact of Sample Type and DNA Isolation Procedure on Genomic  
408 Inference of Microbiome Composition. *mSystems* (2016). doi:10.1128/msystems.00095-  
409 16
- 410 20. Lim, M. Y., Song, E. J., Kim, S. H., Lee, J. & Nam, Y. Do. Comparison of DNA extraction  
411 methods for human gut microbial community profiling. *Syst. Appl. Microbiol.* (2018).  
412 doi:10.1016/j.syapm.2017.11.008
- 413 21. McOrist, A. L., Jackson, M. & Bird, A. R. A comparison of five methods for extraction of  
414 bacterial DNA from human faecal samples. *J. Microbiol. Methods* (2002).  
415 doi:10.1016/S0167-7012(02)00018-0
- 416 22. Stinson, L. F., Keelan, J. A. & Payne, M. S. Comparison of Meconium DNA extraction  
417 methods for use in microbiome studies. *Front. Microbiol.* (2018).  
418 doi:10.3389/fmicb.2018.00270
- 419 23. Vesty, A., Biswas, K., Taylor, M. W., Gear, K. & Douglas, R. G. Evaluating the impact of  
420 DNA extraction method on the representation of human oral bacterial and fungal  
421 communities. *PLoS One* (2017). doi:10.1371/journal.pone.0169877
- 422 24. Walden, C., Carbonero, F. & Zhang, W. Assessing impacts of DNA extraction methods  
423 on next generation sequencing of water and wastewater samples. *J. Microbiol. Methods*  
424 (2017). doi:10.1016/j.mimet.2017.07.007
- 425 25. Whiteside, S. A., Razvi, H., Dave, S., Reid, G. & Burton, J. P. The microbiome of the  
426 urinary tract - A role beyond infection. *Nature Reviews Urology* (2015).  
427 doi:10.1038/nrurol.2014.361
- 428 26. Xue, M., Wu, L., He, Y., Liang, H. & Wen, C. Biases during DNA extraction affect  
429 characterization of the microbiota associated with larvae of the Pacific white shrimp,  
430 *Litopenaeus vannamei*. *PeerJ* (2018). doi:10.7717/peerj.5257
- 431 27. Ackerman, A. L. & Underhill, D. M. The mycobiome of the human urinary tract: Potential  
432 roles for fungi in urology. *Annals of Translational Medicine* (2017).  
433 doi:10.21037/atm.2016.12.69
- 434 28. Thomas-White, K. *et al.* Culturing of female bladder bacteria reveals an interconnected

- 435 urogenital microbiota. *Nat. Commun.* (2018). doi:10.1038/s41467-018-03968-5
- 436 29. Komesu, Y. M. *et al.* Methodology for a vaginal and urinary microbiome study in women  
437 with mixed urinary incontinence. *Int. Urogynecol. J.* (2017). doi:10.1007/s00192-016-  
438 3165-7
- 439 30. Callahan, B. J. *et al.* DADA2: High-resolution sample inference from Illumina amplicon  
440 data. *Nat. Methods* (2016). doi:10.1038/nmeth.3869
- 441 31. Quast, C. *et al.* The SILVA ribosomal RNA gene database project: Improved data  
442 processing and web-based tools. *Nucleic Acids Res.* (2013). doi:10.1093/nar/gks1219
- 443 32. McMurdie, P. J. & Holmes, S. Phyloseq: An R Package for Reproducible Interactive  
444 Analysis and Graphics of Microbiome Census Data. *PLoS One* (2013).  
445 doi:10.1371/journal.pone.0061217
- 446 33. Oksanen, J. *et al.* Package vegan. *R Packag ver* (2013).
- 447
- 448

449 **Acknowledgements:**

450 We thank the clinical research coordinators (Shantae McLean, M.P.H., Robin Gilliam, M.S.W.,  
451 Akira Hayes, M.S.) at the Duke Urogynecology Clinic who assisted in collecting urine samples for  
452 this study. We also thank the Duke University School of Medicine for the use of the Microbiome  
453 Shared Resource (in particular to Holly Dressman, Ph.D.), which provided Promega kit isolation  
454 and all the library preparation services, as well as the Sequencing and Genomic Technologies  
455 Core Facility of the Duke University Center for Genomic and Computational Biology. This study  
456 was funded by: K12 Duke KURe (DK100024) NIDDK and UAH Startup fund to TAS; career  
457 development awards K23 DK110417, R03 AG060082, and P30 AG028716 to NYS; and K01  
458 DK116706 to LK.

459

460

461 **Author Contributions:**

462 TAS conceived the study and performed the experiments; TZ and AB assisted with literature  
463 review, analysis and data annotation; TAS, LK, and NYS analyzed the data; CLA contributed in  
464 discussing the results and editing the manuscript. TAS, LK and NYS interpreted the data and  
465 wrote the manuscript. All authors read and approved the final manuscript.

466

467 **Competing interests:**

468 The authors declare no competing interests.

469

470

471 **Figure Legends:**

472

473 **Figure 1. Isolation kits produce different total DNA concentrations but similar 16S**  
474 **specific sequencing depth. A.** DNA concentration measured by Qubit varied significantly by  
475 DNA isolation kit used (Kruskal-Wallis  $p = 0.0007$ ). **B.** Differences in total DNA concentration did  
476 not translate to significant differences in the number of sequence reads per sample (Kruskal-  
477 Wallis  $p = 0.806$ ).

478

479 **Figure 2. Richness and evenness of the microbial composition does not depend on the**  
480 **testing DNA isolation kit** (Kruskal-Wallis  $p = 0.292, 0.363, \text{ and } 0.436$ , respectively).

481

482 **Figure 3. Differences in the DNA isolation methods do not result in drastic changes in**  
483 **relative abundances of identified genera. A.** Multidimensional scaling plot using Bray Curtis  
484 distance demonstrates that most samples are not significantly different due to DNA isolation kit  
485 ( $p = 0.87$  in PERMANOVA analysis), though samples 4 and 7 are not tightly clustered,  
486 indicating that these samples may have significant variations in microbiome composition by kit.  
487 **B.** Stacked bar plots represent the microbial composition of each sample after DNA isolation  
488 and 16S rRNA gene sequencing. Only sample 4, 7, and negative control PBS exhibit more  
489 variability.

490

491 **Figure 4. DNA from Gram positive bacteria was consistently presented in four out of five**  
492 **tested DNA isolation kits.** The Promega kit recovered Gram positive bacteria, but at lower  
493 abundance than the other kits, though this was not significantly different (Kruskal-Wallis,  $p =$   
494  $0.197$ ).

495

496 **Figure 5. Comparison of relative abundances of genera with biologically-significant**  
497 **representatives.** We compared relative abundances of bacteria recovered from eight genera  
498 with high biologic relevance including urinary pathogens (*Escherichia*, *Klebsiella*, *Enterococcus*)  
499 and commensals (*Lactobacillus*, *Corynebacterium*, *Prevotella*, *Staphylococcus*, *Gardnerella*).  
500 *Corynebacterium*, *Enterococcus*, *Lactobacillus*, and *Staphylococcus* are Gram positive bacteria  
501 and thus have cell walls that are more difficult to lyse during DNA isolation. *Gardnerella* are  
502 considered Gram variable while the *Escherichia*, *Klebsiella*, and *Prevotella* are considered  
503 Gram negative bacteria. The Promega kit tends to recover fewer Gram positive *Corynebacteria*,  
504 *Enterococci*, and *Staphylococci* compared to other kits while the PowerSoil kit recovers more  
505 *Escherichia* and *Klebsiella* compared to other kits.

506

507

508 **Table 1. Characteristics of microbial DNA isolation kits used in this study**

| Kit           | Full name                                           | Mechanical lysis | Enzymatic lysis | Chemical lysis | Heat treatment | Gram+ adaptation | DNA binding               |
|---------------|-----------------------------------------------------|------------------|-----------------|----------------|----------------|------------------|---------------------------|
| BiOstic       | Qiagen BiOstic Bacteremia                           | Yes              | No              | Yes (G)        | Yes            | No               | Silica spin-column        |
| Blood& Tissue | Qiagen DNeasy Blood and Tissue                      | No               | Yes (L, PK)     | Yes (D, G)     | Yes            | Yes              | Silica spin-column        |
| Promega       | Promega Maxwell RSC Purefood GMO and Authentication | No               | Yes (PK)        | Yes (G)        | Yes            | No               | Cellulose-based particles |
| PowerSoil     | Qiagen DNeasy PowerSoil                             | Yes              | No              | Yes (G)        | No             | No               | Silica spin-column        |
| UltraClean    | Qiagen DNeasy UltraClean                            | Yes              | No              | Yes (D, G)     | Yes            | No               | Silica spin-column        |

509 \*L – lysozyme, PK – proteinase K, G – guanidine salts, D – detergent

510

511
